# Supplementary material for: Whole Exome Sequencing for a Patient with Rubinstein-Taybi Syndrome Reveals de Novo Variants besides an Overt CREBBP Mutation
Source: PubMed Central journal article supplement (PMC4394500; doi:10.3390/ijms16035697), 2015-03-11
Supplement: ijms-16-05697-s001.pdf [file ijms-16-05697-s001.pdf]

# Supplementary Information

**Table S1.** Exome Sequencing results and variant statistics.

| <b>Sample</b>                     | <b>Father</b> | <b>Mother</b> | <b>Daughter</b> |
|-----------------------------------|---------------|---------------|-----------------|
| Total reads                       | 118,107,056   | 105,819,946   | 111,140,886     |
| Mapped reads                      | 117,000,234   | 104,605,168   | 110,159,887     |
| Mapped reads (%)                  | 99            | 99            | 99.1            |
| Non-duplicate reads               | 105,488,263   | 92,767,292    | 99,213,228      |
| Non-duplicate reads (%)           | 89            | 88            | 89              |
| On-target reads                   | 95,777,991    | 81,868,105    | 88,767,150      |
| On-target reads (%)               | 81            | 77            | 80              |
| Mean depth                        | 141           | 120           | 131.58          |
| Bases_above_1 (%)                 | 99            | 99            | 99              |
| Bases_above_5 (%)                 | 97            | 99            | 97              |
| Bases_above_10 (%)                | 95            | 94            | 95              |
| Bases_above_20 (%)                | 91            | 90            | 90              |
| Total                             | 122,157       | 120,673       | 123,392         |
| Homozygous                        | 57,587        | 57,246        | 56,173          |
| Heterozygous                      | 63,661        | 62,644        | 66,718          |
| Transition/Transversion Ratio (%) | 2.25          | 2.26          | 2.28            |
| CDS                               | 20,154        | 19,813        | 20,318          |
| Utr5                              | 3299          | 3181          | 3252            |
| Utr3                              | 3423          | 3353          | 3445            |
| Intron                            | 76,807        | 75,090        | 77,129          |
| Non_coding_exon                   | 6260          | 6094          | 6284            |
| Non_coding_intron                 | 19,412        | 19,197        | 19,490          |
| Silent                            | 9934          | 9694          | 10,017          |
| Missense                          | 8875          | 8770          | 8939            |
| Inframe                           | 226           | 203           | 214             |
| Frameshift                        | 119           | 126           | 121             |
| Non-sense                         | 70            | 78            | 81              |
| Read through                      | 18            | 17            | 20              |
| Start codon                       | 27            | 29            | 32              |
| Splicing                          | 176           | 163           | 172             |
| Junction                          | 59            | 65            | 65              |
| NS/SS/Indel                       | 9469          | 9346          | 9536            |

**Table S2.** Previous reports of *CREBBP* mutations in Rubinstein-Taybi Syndrome.

| Index | Phenotype | cDNA Change           | A.A <sup>-1</sup> Variant | Origin         | OMIM ID | dbSNP | Reference                                                           |
|-------|-----------|-----------------------|---------------------------|----------------|---------|-------|---------------------------------------------------------------------|
| 1     |           | c.3833A>C             | p.Glu1278Ala              | <i>de novo</i> | -       | -     | Gervasini, personal communication, Netherlands: Leiden <sup>2</sup> |
| 2     |           | c.4014G>C             | p.Leu1338Phe              | <i>de novo</i> | -       | -     | Gervasini, personal communication, Netherlands: Leiden <sup>2</sup> |
| 3     |           | c.4216G>T             | p.Asp1406Tyr              | <i>de novo</i> | -       | -     | Gervasini, personal communication, Netherlands: Leiden <sup>2</sup> |
| 4     |           | c.4281-7C>G           | p.? <sup>3</sup>          | <i>de novo</i> | -       | -     | Gervasini, personal communication, Netherlands: Leiden <sup>2</sup> |
| 5     |           | c.4444T>G             | p.Tyr1482Asp              | <i>de novo</i> | -       | -     | Gervasini, personal communication, Netherlands: Leiden <sup>2</sup> |
| 6     |           | c.5060C>T             | p.Ser1687Phe              | <i>de novo</i> | -       | -     | Gervasini, personal communication, Netherlands: Leiden <sup>2</sup> |
| 7     |           | c.85+1G>T             | p.? <sup>3</sup>          | <i>de novo</i> | -       | -     | Gervasini, personal communication, Netherlands: Leiden <sup>2</sup> |
| 8     |           | c.223C>T              | p.Arg75X                  | <i>de novo</i> | -       | -     | Gervasini, personal communication, Netherlands: Leiden <sup>2</sup> |
| 9     |           | c.472C>T              | p.Gln158X                 | <i>de novo</i> | -       | -     | Gervasini, personal communication, Netherlands: Leiden <sup>2</sup> |
| 10    |           | c.810_811delTG        | p.Gly271fs                | <i>de novo</i> | -       | -     | Gervasini, personal communication, Netherlands: Leiden <sup>2</sup> |
| 11    |           | c.1483C>T             | p.Gln495X                 | <i>de novo</i> | -       | -     | Gervasini, personal communication, Netherlands: Leiden <sup>2</sup> |
| 12    |           | c.1515_1521delTGGCCAG | p.Gly506fs                | <i>de novo</i> | -       | -     | Gervasini, personal communication, Netherlands: Leiden <sup>2</sup> |
| 13    |           | c.4650_4654delAGAGA   | p.Glu1551fs               | <i>de novo</i> | -       | -     | Gervasini, personal communication, Netherlands: Leiden <sup>2</sup> |
| 14    |           | c.5790delC            | p.Pro1929fs               | <i>de novo</i> | -       | -     | Gervasini, personal communication, Netherlands: Leiden <sup>2</sup> |
| 15    |           | c.2461C>T             | p.Gln821X                 | <i>de novo</i> | -       | -     | Gervasini, personal communication, Netherlands: Leiden <sup>2</sup> |
| 16    |           | c.3858_3859delTG      | p.Cys1286fs               | <i>de novo</i> | -       | -     | Gervasini, personal communication, Netherlands: Leiden <sup>2</sup> |
| 17    |           | c.4627G>A             | p.Asp1543Asn              | <i>de novo</i> | -       | -     | Gervasini, personal communication, Netherlands: Leiden <sup>2</sup> |
| 18    |           | c.4650_4654delAGAGA   | p.Glu1551fs               | <i>de novo</i> | -       | -     | Gervasini, personal communication, Netherlands: Leiden <sup>2</sup> |
| 19    |           | c.3779+3A>T           | p.? <sup>3</sup>          | <i>de novo</i> | -       | -     | M.J. van Belzen, Netherlands: Leiden <sup>2</sup>                   |
| 20    |           | c.4394+4A>C           | p.? <sup>3</sup>          | <i>de novo</i> | -       | -     | M.J. van Belzen, Netherlands: Leiden <sup>2</sup>                   |
| 21    |           | c.4708G>T             | p.Ala1570Ser              | <i>de novo</i> | -       | -     | M.J. van Belzen, Netherlands: Leiden <sup>2</sup>                   |
| 22    |           | c.4885_4887delAAG     | p.Lys1629del              | <i>de novo</i> | -       | -     | M.J. van Belzen, Netherlands: Leiden <sup>2</sup>                   |
| 23    |           | c.(?_-204)_798+?del   | p.? <sup>3</sup>          | <i>de novo</i> | -       | -     | M.J. van Belzen, Netherlands: Leiden <sup>2</sup>                   |
| 24    |           | c.(?_-204)_798+?del   | p.? <sup>3</sup>          | <i>de novo</i> | -       | -     | M.J. van Belzen, Netherlands: Leiden <sup>2</sup>                   |
| 25    |           | c.37A>G               | p.Lys13Glu                | <i>de novo</i> | -       | -     | M.J. van Belzen, Netherlands: Leiden <sup>2</sup>                   |
| 26    |           | c.1522C>T             | p.Gln508X                 | <i>de novo</i> | -       | -     | M.J. van Belzen, Netherlands: Leiden <sup>2</sup>                   |
| 27    |           | c.3837-?_3982+?del    | p.? <sup>3</sup>          | <i>de novo</i> | -       | -     | M.J. van Belzen, Netherlands: Leiden <sup>2</sup>                   |

Table S2. Cont.

| Index | Phenotype | cDNA Change           | A.A. Variant     | Origin         | OMIM ID   | dbSNP       | Reference                                        |
|-------|-----------|-----------------------|------------------|----------------|-----------|-------------|--------------------------------------------------|
| 28    |           | c.4256_4257delCT      | p.Ser1419X       | <i>de novo</i> | -         | -           | M.J. van Belzen, Netherlands:Leiden <sup>2</sup> |
| 29    | Typical   | c.406C>T              | p.Gln136X        | -              | OMIM 0001 | rs121434624 | Petrij 1995 [13]                                 |
| 30    | Typical   | c.1066C>T             | p.Gln356X        | -              | OMIM 0002 | rs121434625 | Petrij 1995 [13]                                 |
| 31    | Typical   | c.4319_4320delTC      | p.Phe1440fs      | -              | OMIM 0003 | rs121434626 | Murata 2001 [52]                                 |
| 32    | Typical   | c.4898_4908del        | p.Phe1633fs      | -              | OMIM 0004 | -           | Murata 2001 [52]                                 |
| 33    | Mild      | c.3524A>G             | p.Tyr1175Cys     | -              | OMIM 0005 | rs28937315  | Bartsch 2002 [53]                                |
| 34    | Typical   | c.3832G>A             | p.Glu1278Lys     | -              | OMIM 0006 | -           | Kalkhoven 2003 [54]                              |
| 35    | Typical   | c.3837-2A>T           | p.? <sup>3</sup> | -              | OMIM 0007 | -           | Kalkhoven 2003 [54]                              |
| 36    | Mild      | c.2728A>G             | p.Thr910Ala      | -              | OMIM 0008 | -           | Bartsch 2002 [53]                                |
| 37    |           | c.86_233del           | p.Asp29fs        | -              | -         | -           | Bartsch 2002 [53]                                |
| 38    |           | c.1108C>T             | p.Arg370X        | -              | -         | -           | Bartsch 2002 [53]                                |
| 39    |           | c.1216+1G>A           | p.? <sup>3</sup> | -              | -         | -           | Bartsch 2002 [53]                                |
| 40    |           | c.1676+1G>A           | p.? <sup>3</sup> | -              | -         | -           | Bartsch 2002 [53]                                |
| 41    |           | c.4304A>T             | p.Asp1435Val     | -              | -         | -           | Bartsch 2005 [9]                                 |
| 42    |           | c.4991G>A             | p.Arg1664His     | -              | -         | -           | Bartsch 2005 [9]                                 |
| 43    |           | c.474_493del          | p.Val159fs       | -              | -         | -           | Bartsch 2005 [9]                                 |
| 44    |           | c.1270C>T             | p.Arg424X        | -              | -         | -           | Bartsch 2005 [9]                                 |
| 45    |           | c.1891_1895delGCCTA   | p.Ala631fs       | -              | -         | -           | Bartsch 2005 [9]                                 |
| 46    |           | c.2986G>T             | p.Glu996X        | -              | -         | -           | Bartsch 2005 [9]                                 |
| 47    |           | c.3639C>A             | p.Cys1213X       | -              | -         | -           | Bartsch 2005 [9]                                 |
| 48    |           | c.3767_3769delCAC     | p.Ser1256X       | -              | -         | -           | Bartsch 2005 [9]                                 |
| 49    |           | c.4321dupC            | p.Arg1441fs      | -              | -         | -           | Bartsch 2005 [9]                                 |
| 50    |           | c.5635C>T             | p.Gln1879X       | -              | -         | -           | Bartsch 2005 [9]                                 |
| 51    |           | c.6019C>T             | p.Gln2007X       | -              | -         | -           | Bartsch 2005 [9]                                 |
| 52    |           | c.6044_6050dupGCATGCC | p.Pro2018fs      | -              | -         | -           | Bartsch 2005 [9]                                 |
| 53    |           | c.40A>G               | p.Arg14Gly       | -              | -         | -           | Bentivegna 2006 [10]                             |
| 54    |           | c.4445A>G             | p.Tyr1482Cys     | -              | -         | -           | Bentivegna 2006 [10]                             |

Table S2. *Cont.*

| Index | Phenotype | cDNA Change               | A.A. Variant     | Origin | OMIM ID | dbSNP | Reference            |
|-------|-----------|---------------------------|------------------|--------|---------|-------|----------------------|
| 55    |           | c.4627G>T                 | p.Asp1543Tyr     | -      | -       | -     | Bentivegna 2006 [10] |
| 56    |           | c.1108C>T                 | p.Arg370X        | -      | -       | -     | Bentivegna 2006 [10] |
| 57    |           | c.1270C>T                 | p.Arg424X        | -      | -       | -     | Bentivegna 2006 [10] |
| 58    |           | c.1984C>T                 | p.Gln662X        | -      | -       | -     | Bentivegna 2006 [10] |
| 59    |           | c.3351_3352dupCC          | p.Gln1118fs      | -      | -       | -     | Bentivegna 2006 [10] |
| 60    |           | c.3517C>T                 | p.Arg1173X       | -      | -       | -     | Bentivegna 2006 [10] |
| 61    |           | c.3715_3716delAA          | p.Lys1239fs      | -      | -       | -     | Bentivegna 2006 [10] |
| 62    |           | c.4435G>T                 | p.Gly1479X       | -      | -       | -     | Bentivegna 2006 [10] |
| 63    |           | c.4728+1G>A               | p.? <sup>3</sup> | -      | -       | -     | Bentivegna 2006 [10] |
| 64    |           | c.4963delC                | p.Leu1655fs      | -      | -       | -     | Bentivegna 2006 [10] |
| 65    |           | c.6043delA                | p.Ser2015fs      | -      | -       | -     | Bentivegna 2006 [10] |
| 66    |           | c.6065_6071delAGCAGGC     | p.Gln2022fs      | -      | -       | -     | Bentivegna 2006 [10] |
| 67    |           | c.6661A>C                 | p.Met2221Leu     | -      | -       | -     | Coupry 2002 [55]     |
| 68    |           | c.2941G>A                 | p.Ala981Thr      | -      | -       | -     | Coupry 2002 [55]     |
| 69    |           | c.3698+3A>T               | p.? <sup>3</sup> | -      | -       | -     | Coupry 2002 [55]     |
| 70    |           | c.4561-5C>G               | p.? <sup>3</sup> | -      | -       | -     | Coupry 2002 [55]     |
| 71    |           | c.6728C>T                 | p.Ala2243Val     | -      | -       | -     | Coupry 2002 [55]     |
| 72    |           | c.4559A>G                 | p.Lys1520Arg     | -      | -       | -     | Coupry 2002 [55]     |
| 73    |           | c.68C>A                   | p.Ser23X         | -      | -       | -     | Coupry 2002 [55]     |
| 74    |           | c.139delAinsTCATCATGAGCTG | p.Asn47fs        | -      | -       | -     | Coupry 2002 [55]     |
| 75    |           | c.840dupT                 | p.Ser281X        | -      | -       | -     | Coupry 2002 [55]     |
| 76    |           | c.1108C>T                 | p.Arg370X        | -      | -       | -     | Coupry 2002 [55]     |
| 77    |           | c.1237C>T                 | p.Arg413X        | -      | -       | -     | Coupry 2002 [55]     |
| 78    |           | c.2045dupA                | p.Pro683fs       | -      | -       | -     | Coupry 2002 [55]     |
| 79    |           | c.2827delC                | p.Gln943fs       | -      | -       | -     | Coupry 2002 [55]     |
| 80    |           | c.3096dupT                | p.Lys1033X       | -      | -       | -     | Coupry 2002 [55]     |

Table S2. *Cont.*

| Index | Phenotype | cDNA Change           | A.A. Variant     | Origin | OMIM ID | dbSNP | Reference                                                               |
|-------|-----------|-----------------------|------------------|--------|---------|-------|-------------------------------------------------------------------------|
| 81    |           | c.3369_3369+6delinsCA | p.? <sup>3</sup> | -      | -       | -     | Coupry 2002 [55]                                                        |
| 82    |           | c.3805A>T             | p.Lys1269X       | -      | -       | -     | Coupry 2002 [55]                                                        |
| 83    |           | c.4280+2T>C           | p.? <sup>3</sup> | -      | -       | -     | Coupry 2002 [55]                                                        |
| 84    |           | c.4398T>A             | p.Tyr1466X       | -      | -       | -     | Coupry 2002 [55]                                                        |
| 85    |           | c.4492C>T             | p.Arg1498X       | -      | -       | -     | Coupry 2002 [55]                                                        |
| 86    |           | c.4945delA            | p.Ile1649fs      | -      | -       | -     | Coupry 2002 [55]                                                        |
| 87    |           | c.6127C>T             | p.Gln2043X       | -      | -       | -     | Coupry 2002 [55]                                                        |
| 88    |           | c.1011dupA            | p.Gln338fs       | -      | -       | -     | D.J.M. Peters, personal communication, Netherlands: Leiden <sup>2</sup> |
| 89    |           | c.1114C>T             | p.Gln372X        | -      | -       | -     | D.J.M. Peters, personal communication, Netherlands: Leiden <sup>2</sup> |
| 90    |           | c.1412_1415delGTAA    | p.Ser471fs       | -      | -       | -     | D.J.M. Peters, personal communication, Netherlands: Leiden <sup>2</sup> |
| 91    |           | c.2254C>T             | p.Gln752X        | -      | -       | -     | D.J.M. Peters, personal communication, Netherlands: Leiden <sup>2</sup> |
| 92    |           | c.2678C>A             | p.Ser893X        | -      | -       | -     | D.J.M. Peters, personal communication, Netherlands: Leiden <sup>2</sup> |
| 93    |           | c.2724delT            | p.Ser908fs       | -      | -       | -     | D.J.M. Peters, personal communication, Netherlands: Leiden <sup>2</sup> |
| 94    |           | c.2810dupC            | p.Ser938fs       | -      | -       | -     | D.J.M. Peters, personal communication, Netherlands: Leiden <sup>2</sup> |
| 95    |           | c.4561-2A>G           | p.? <sup>3</sup> | -      | -       | -     | D.J.M. Peters, personal communication, Netherlands: Leiden <sup>2</sup> |
| 96    |           | c.4872dupC            | p.Met1625fs      | -      | -       | -     | D.J.M. Peters, personal communication, Netherlands: Leiden <sup>2</sup> |
| 97    |           | c.5710C>T             | p.Gln1904X       | -      | -       | -     | D.J.M. Peters, personal communication, Netherlands: Leiden <sup>2</sup> |
| 98    |           | c.4394+5G>T           | p.? <sup>3</sup> | -      | -       | -     | Gervasini, personal communication, Netherlands: Leiden <sup>2</sup>     |
| 99    |           | c.4133G>C             | p.Arg1378Cys     | -      | -       | -     | Gervasini, personal communication, Netherlands: Leiden <sup>2</sup>     |
| 100   |           | c.317dupA             | p.Pro107fs       | -      | -       | -     | Gervasini, personal communication, Netherlands: Leiden <sup>2</sup>     |
| 101   |           | c.2356delC            | p.Gln786fs       | -      | -       | -     | Gervasini, personal communication, Netherlands: Leiden <sup>2</sup>     |
| 102   |           | c.3546delA            | p.Glu1183fs      | -      | -       | -     | Gervasini, personal communication, Netherlands: Leiden <sup>2</sup>     |
| 103   |           | c.3608_3609+5del      | p.? <sup>3</sup> | -      | -       | -     | Gervasini, personal communication, Netherlands: Leiden <sup>2</sup>     |
| 104   |           | c.3751delC            | p.Leu1251fs      | -      | -       | -     | Gervasini, personal communication, Netherlands: Leiden <sup>2</sup>     |
| 105   |           | c.4400delT            | p.Val1467fs      | -      | -       | -     | Gervasini, personal communication, Netherlands: Leiden <sup>2</sup>     |
| 106   |           | c.4492C>T             | p.Arg1498X       | -      | -       | -     | Gervasini, personal communication, Netherlands: Leiden <sup>2</sup>     |
| 107   |           | c.5837dupC            | p.Pro1947fs      | -      | -       | -     | Gervasini, personal communication, Netherlands: Leiden <sup>2</sup>     |

Table S2. *Cont.*

| Index | Phenotype | cDNA Change            | A.A. Variant     | Origin | OMIM ID | dbSNP | Reference                                                           |
|-------|-----------|------------------------|------------------|--------|---------|-------|---------------------------------------------------------------------|
| 108   |           | c.5837delC             | p.Pro1946fs      | -      | -       | -     | Gervasini, personal communication, Netherlands: Leiden <sup>2</sup> |
| 109   |           | c.5838_5857dup20       | p.Pro1953fs      | -      | -       | -     | Gervasini, personal communication, Netherlands: Leiden <sup>2</sup> |
| 110   |           | c.3779+5G>C            | p.? <sup>3</sup> | -      | -       | -     | Kalkhoven 2004 [56]                                                 |
| 111   |           | c.4991G>A              | p.Arg1664His     | -      | -       | -     | Kalkhoven 2004 [56]                                                 |
| 112   |           | c.4133+1G>A            | p.? <sup>3</sup> | -      | -       | -     | Kalkhoven 2004 [56]                                                 |
| 113   |           | c.4669C>T              | p.Glu1557X       | -      | -       | -     | Kalkhoven 2004 [56]                                                 |
| 114   |           | c.4837delG             | p.Val1613fs      | -      | -       | -     | Kalkhoven 2004 [56]                                                 |
| 115   |           | c.5837dupC             | p.Pro1947fs      | -      | -       | -     | M.J. van Belzen <sup>2</sup>                                        |
| 116   |           | c.3832G>A              | p.Glu1278Lys     | -      | -       | -     | M.J. van Belzen, Netherlands: Leiden <sup>2</sup>                   |
| 117   |           | c.3832G>A              | p.Glu1278Lys     | -      | -       | -     | M.J. van Belzen, Netherlands: Leiden <sup>2</sup>                   |
| 118   |           | c.(?-204)_(*2664_?)del | p.? <sup>3</sup> | -      | -       | -     | M.J. van Belzen, Netherlands: Leiden <sup>2</sup>                   |
| 119   |           | c.86-?_798+?del        | p.? <sup>3</sup> | -      | -       | -     | M.J. van Belzen, Netherlands: Leiden <sup>2</sup>                   |
| 120   |           | c.277dupA              | p.Ser93fs        | -      | -       | -     | M.J. van Belzen, Netherlands: Leiden <sup>2</sup>                   |
| 121   |           | c.1069C>T              | p.Gln357X        | -      | -       | -     | M.J. van Belzen, Netherlands: Leiden <sup>2</sup>                   |
| 122   |           | c.1237C>T              | p.Arg413X        | -      | -       | -     | M.J. van Belzen, Netherlands: Leiden <sup>2</sup>                   |
| 123   |           | c.1270C>T              | p.Arg424X        | -      | -       | -     | M.J. van Belzen, Netherlands: Leiden <sup>2</sup>                   |
| 124   |           | c.1318C>T              | p.Arg440X        | -      | -       | -     | M.J. van Belzen, Netherlands: Leiden <sup>2</sup>                   |
| 125   |           | c.1655delC             | p.Pro552fs       | -      | -       | -     | M.J. van Belzen, Netherlands: Leiden <sup>2</sup>                   |
| 126   |           | c.2842C>T              | p.Gln948X        | -      | -       | -     | M.J. van Belzen, Netherlands: Leiden <sup>2</sup>                   |
| 127   |           | c.2842C>T              | p.Gln948X        | -      | -       | -     | M.J. van Belzen, Netherlands: Leiden <sup>2</sup>                   |
| 128   |           | c.2879delC             | p.Pro960fs       | -      | -       | -     | M.J. van Belzen, Netherlands: Leiden <sup>2</sup>                   |
| 129   |           | c.3061-?_3698+?del     | p.? <sup>3</sup> | -      | -       | -     | M.J. van Belzen, Netherlands: Leiden <sup>2</sup>                   |
| 130   |           | c.3375T>G              | p.Tyr1125X       | -      | -       | -     | M.J. van Belzen, Netherlands: Leiden <sup>2</sup>                   |
| 131   |           | c.3547G>T              | p.Glu1183X       | -      | -       | -     | M.J. van Belzen, Netherlands: Leiden <sup>2</sup>                   |
| 132   |           | c.3610-2A>G            | p.? <sup>3</sup> | -      | -       | -     | M.J. van Belzen, Netherlands: Leiden <sup>2</sup>                   |
| 133   |           | c.3610-1G>A            | p.? <sup>3</sup> | -      | -       | -     | M.J. van Belzen, Netherlands: Leiden <sup>2</sup>                   |
| 134   |           | c.3779+2T>C            | p.? <sup>3</sup> | -      | -       | -     | M.J. van Belzen, Netherlands: Leiden <sup>2</sup>                   |

Table S2. *Cont.*

| Index | Phenotype | cDNA Change           | A.A. Variant     | Origin | OMIM ID | dbSNP | Reference                                         |
|-------|-----------|-----------------------|------------------|--------|---------|-------|---------------------------------------------------|
| 135   |           | c.3817_3821dupGATAC   | p.Leu1275fs      | -      | -       | -     | M.J. van Belzen, Netherlands: Leiden <sup>2</sup> |
| 136   |           | c.3862_3871del        | p.Arg1288fs      | -      | -       | -     | M.J. van Belzen, Netherlands: Leiden <sup>2</sup> |
| 137   |           | c.3914+1G>T           | p.? <sup>3</sup> | -      | -       | -     | M.J. van Belzen, Netherlands: Leiden <sup>2</sup> |
| 138   |           | c.3983-?_(*2664_?)del | p.? <sup>3</sup> | -      | -       | -     | M.J. van Belzen, Netherlands: Leiden <sup>2</sup> |
| 139   |           | c.4268dupC            | p.Pro1424fs      | -      | -       | -     | M.J. van Belzen, Netherlands: Leiden <sup>2</sup> |
| 140   |           | c.4396_4406del        | p.Tyr1466fs      | -      | -       | -     | M.J. van Belzen, Netherlands: Leiden <sup>2</sup> |
| 141   |           | c.4567_4568delTT      | p.Phe1523fs      | -      | -       | -     | M.J. van Belzen, Netherlands: Leiden <sup>2</sup> |
| 142   |           | c.5641_5642delAG      | p.Leu1882fs      | -      | -       | -     | M.J. van Belzen, Netherlands: Leiden <sup>2</sup> |
| 143   |           | c.5821C>T             | p.Gln1941X       | -      | -       | -     | M.J. van Belzen, Netherlands: Leiden <sup>2</sup> |
| 144   |           | c.6010C>T             | p.Arg2004X       | -      | -       | -     | M.J. van Belzen, Netherlands: Leiden <sup>2</sup> |
| 145   |           | c.6213delG            | p.Arg2072fs      | -      | -       | -     | M.J. van Belzen, Netherlands: Leiden <sup>2</sup> |
| 146   |           | c.6436C>T             | p.Gln2146X       | -      | -       | -     | M.J. van Belzen, Netherlands: Leiden <sup>2</sup> |
| 147   |           | c.5212_5213ins14      | p.His1738fs      | -      | -       | -     | Murata 2001 [52]                                  |
| 148   |           | c.5222_5223delAG      | p.Lys1741fs      | -      | -       | -     | Murata 2001 [52]                                  |
| 149   |           | c.86-?_798+?del       | p.? <sup>3</sup> | -      | -       | -     | Netherlands: Leiden                               |
| 150   |           | c.4340C>T             | p.Thr1447Ile     | -      | -       | -     | Roelfsema 2005 [56]                               |
| 151   |           | c.4348T>C             | p.Tyr1450His     | -      | -       | -     | Roelfsema 2005 [56]                               |
| 152   |           | c.4409A>G             | p.His1470Arg     | -      | -       | -     | Roelfsema 2005 [56]                               |
| 153   |           | c.235delG             | p.Gly79fs        | -      | -       | -     | Roelfsema 2005 [56]                               |
| 154   |           | c.304C>T              | p.Gln102X        | -      | -       | -     | Roelfsema 2005 [8]                                |
| 155   |           | c.904_905delAG        | p.Ser302fs       | -      | -       | -     | Roelfsema 2005 [56]                               |
| 156   |           | c.1237C>T             | p.Arg413X        | -      | -       | -     | Roelfsema 2005 [56]                               |
| 157   |           | c.1481dupA            | p.Asn494fs       | -      | -       | -     | Roelfsema 2005 [56]                               |
| 158   |           | c.3396_3400delCATGG   | p.Pro1133fs      | -      | -       | -     | Roelfsema 2005 [56]                               |
| 159   |           | c.3432_3433delAG      | p.Gly1145fs      | -      | -       | -     | Roelfsema 2005 [56]                               |
| 160   |           | c.3824dupT            | p.Leu1275fs      | -      | -       | -     | Roelfsema 2005 [56]                               |
| 161   |           | c.3915-1G>A           | p.? <sup>3</sup> | -      | -       | -     | Roelfsema 2005 [56]                               |

Table S2. *Cont.*

| Index | Phenotype | cDNA Change            | A.A. Variant     | Origin | OMIM ID | dbSNP | Reference                                             |
|-------|-----------|------------------------|------------------|--------|---------|-------|-------------------------------------------------------|
| 162   |           | c.4398dupT             | p.Val1467fs      | -      | -       | -     | Roelfsema 2005 [56]                                   |
| 163   |           | c.4879A>T              | p.Lys1627X       | -      | -       | -     | Roelfsema 2005 [56]                                   |
| 164   |           | c.6010C>T              | p.Arg2004X       | -      | -       | -     | Roelfsema 2005 [56]                                   |
| 165   |           | c.6133C>T              | p.Gln2045X       | -      | -       | -     | Roelfsema 2005 [56]                                   |
| 166   |           | c.6283C>T              | p.Gln2095X       | -      | -       | -     | Roelfsema 2005 [56]                                   |
| 167   |           | c.1388_1395delGGCAACAG | p.Gly463fs       | -      | -       | -     | Roelfsema 2005 [56], Netherlands: Leiden <sup>2</sup> |
| 168   |           | c.1735dupA             | p.Thr579fs       | -      | -       | -     | Roelfsema 2005 [56], Netherlands: Leiden <sup>2</sup> |
| 169   |           | c.3833A>G              | p.Glu1278Gly     | -      | -       | -     | Udaka 2005 [57]                                       |
| 170   |           | c.4238A>C              | p.His1413Pro     | -      | -       | -     | Udaka 2005 [57]                                       |
| 171   |           | c.1108C>T              | p.Arg370X        | -      | -       | -     | Udaka 2005 [57]                                       |
| 172   |           | c.1270C>T              | p.Arg424X        | -      | -       | -     | Udaka 2005 [57]                                       |
| 173   |           | c.1733delC             | p.Pro578fs       | -      | -       | -     | Udaka 2005 [57]                                       |
| 174   |           | c.2749dupA             | p.Thr917fs       | -      | -       | -     | Udaka 2005 [57]                                       |
| 175   |           | c.3545dupC             | p.Glu1183fs      | -      | -       | -     | Udaka 2005 [57]                                       |
| 176   |           | c.3698+1G>A            | p.? <sup>3</sup> | -      | -       | -     | Udaka 2005 [57]                                       |
| 177   |           | c.3836+1G>A            | p.? <sup>3</sup> | -      | -       | -     | Udaka 2005 [57]                                       |
| 178   |           | c.4492C>T              | p.Arg1498X       | -      | -       | -     | Udaka 2005 [57]                                       |
| 179   |           | c.4611delG             | p.Tyr1539fs      | -      | -       | -     | Udaka 2005 [57]                                       |
| 180   |           | c.5793dupC             | p.Thr1932fs      | -      | -       | -     | Udaka 2005 [57]                                       |

<sup>1</sup> Variant of Amino Acid. Protein change predicted from RNA; <sup>2</sup> Do not have reference. But have LOVD submitter ID; <sup>3</sup> Unknown. Protein change not predicted from RNA; OMIM ID: OMIM (Online Mendelian Inheritance in Man) allelic variant ID in CREBBP; dbSNP: dbSNP (Single Nucleotide Polymorphism Database) variant ID. The rs number is an accession number used by researchers and databases to refer to specific SNPs. It stands for Reference SNP cluster ID; and Hyphens (-) in table mean not-available or not-found.
